# The Association between Aids Related Stigma and Major Depressive Disorder among HIV-Positive Individuals in Uganda

Dickens Akena<sup>1,2\*</sup>, Seggane Musisi<sup>2</sup>, John Joska<sup>1</sup>, Dan J. Stein<sup>1</sup>

**1** Department of Psychiatry and Mental Health, University of Cape Town, Cape Town, South Africa, **2** Department of Psychiatry, Makerere University, Kampala, Uganda

## Abstract

**Background:** Major depressive disorder in people living with HIV/AIDS (PLWHA) is common and may be associated with a number of factors, including AIDS-related stigma, decreased CD4 levels, increased opportunistic infections and sociodemographic variables. The extent to which AIDS-related stigma is associated with major depressive disorder among PLWHA has not been well studied in sub-Saharan Africa. The objective of this study was to examine the associations between major depressive disorder, AIDS-related stigma, immune status, and sociodemographic variables with the aim of making recommendations that can guide clinicians.

**Methods:** We assessed 368 PLWHA for major depressive disorder, as well as for potentially associated factors, including AIDS-related stigma, CD4 levels, presence of opportunistic infections, and sociodemographic variables.

**Results:** The prevalence of major depressive disorder was 17.4%, while 7.9% of the participants had AIDS related stigma. At multivariable analysis, major depressive disorder was significantly associated with AIDS-related stigma [OR = 1.65, CI (1.20–2.26)], a CD4 count of  $\geq 200$  [OR 0.52 CI (0.27–0.99)], and being of younger age [0.95, CI (0.92–0.98)].

**Conclusions:** Due to the high burden of major depressive disorder, and its association with AIDS related stigma, routine screening of PLWHA for both conditions is recommended. However, more research is required to understand this association.

**Citation:** Akena D, Musisi S, Joska J, Stein DJ (2012) The Association between Aids Related Stigma and Major Depressive Disorder among HIV-Positive Individuals in Uganda. PLoS ONE 7(11): e48671. doi:10.1371/journal.pone.0048671

**Editor:** D. William Cameron, University of Ottawa, Canada

**Received:** June 14, 2012; **Accepted:** September 28, 2012; **Published:** November 27, 2012

**Copyright:** © 2012 Akena et al. This is an open-access article distributed under the terms of the Creative Commons Attribution License, which permits unrestricted use, distribution, and reproduction in any medium, provided the original author and source are credited.

**Funding:** The study received funding from the International Student Scholarship at the University of Cape Town(UCT), and the African Doctoral Dissertation Research Fellowship(ADDRF). The funders had no role in study design, data collection and analysis, decision to publish, or preparation of the manuscript.

**Competing Interests:** The authors have declared that no competing interests exist.

\* E-mail: akenadickens@yahoo.co.uk

## Introduction

HIV/AIDS is one of the biggest health crises the world faces today, with close to two-thirds of all people living with HIV/AIDS (PLWHA) residing in sub-Saharan Africa [1]. The prevalence of HIV/AIDS in Uganda in 2012 stood at 7.2%, with women disproportionately represented [2]. The recent ministry of health demographic survey put the prevalence of HIV/AIDS at 8.3% in women and 6.1% in men [2]. Treatment coverage for PLWHA is poor in Uganda, with only half of PLWHA accessing antiretroviral therapy (ART) [3].

Among PLWHA, depressive disorder is the commonest neuropsychiatric disorder, occurring at rates two to three times higher than in HIV-negative patients [4–6]. The prevalence of depressive disorder among PLWHA in Uganda has been reported as 20–40% [7–10]. Depressive disorder in PLWHA has been associated with several critical adverse health-related outcomes. Previous work has documented poor adherence to medications, including ART in depressed PLWHA [11–13]. Other researchers have also documented that PLWHA suffering from depression progress faster from HIV to AIDS compared to non-depressed PLWHA [14–17]. Compared to depressed HIV negative persons,

PLWHA who suffer from depression have also been shown to have a poor quality of life [18].

The development of depressive disorder among PLWHA is likely the result of a combination of biological and sociodemographic variables [14,19–22]. Some of these biological variables may be relatively unique to PLWHA, such as AIDS-related stigma [20,21], compromised immune status (low CD4 counts) and increased opportunistic infections [19,23,24]. However, socio-demographic variables including gender, low education and lack of employment have been associated with depression in both HIV negative and positive populations [22,25,26].

AIDS-related stigma is prominent among PLWHA and has been shown to negatively impact on the quality of life, leading to poor functioning of affected individuals [27,28]. Research has also shown that PLWHA who have stigma are less likely to access HIV care services [27,29,30], and could have poor psychological wellbeing [21,31]. Some work done in South Africa has documented increased burden of AIDS stigma and its association with mental disorders [20,32]. Despite its prominence, AIDS related stigma among PLWHA is often unidentified [28,30,32,33].

The dual existence of AIDS related stigma and major depressive disorder among PLWHA could lead to a number of adverse health outcomes. However, little work has been done to particularly assess the association between AIDS related stigma and major depressive disorder in sub-Saharan Africa [20,32,33]. Examining the relationship between AIDS related stigma and major depressive could prove useful in raising clinician's awareness about the need to holistically assess PLWHA who present at PHC.

Similarly, literature about the other factors that may be associated with major depressive disorder, including immunological and sociodemographic variables in PLWHA is less consistent. Thus while some work has reported that a low CD4 count is associated with having depression in PLWHA [15,17], other researchers have found otherwise [22,34]. Research findings about the association between major depressive disorder and female gender [22,35], being of younger age [35–37] and unemployment [37] have equally shown inconsistencies. Examining the association between depression and these factors is important since some of them have been shown to influence health outcomes in PLWHA [15,19,22].

In this study, we investigated the extent to which major depressive disorder was associated with AIDS-related stigma, and a number of other variables in PLWHA with the aim of making recommendations that can guide clinicians.

## Methods

### Study design and setting

This was a cross sectional study which took place at the Nsambya Hospital Home care department, an HIV-PHC facility 3 km from Kampala city, between the months of April and June 2011.

### Study population

The study population consisted of PLWHA who were medically stable and had been in care for at least 6 months. Patients were excluded if they presented with a mental illness requiring admission.

### Study procedure

About 150–200 patients attend the clinic daily; each of them is given a number based on time of arrival (1–200 for example). Using EPIDATA, we randomly generated 15–20 numbers daily, each number belonging to a potential clinic attendee, who would be approached and informed consent obtained. Triage nurses then administered the patient health questionnaire-9(PHQ-9) [38] to screen for depression.

Research assistants, who were medical Doctors and holders of an MBChB degree, and were trained by the principal investigator, administered the study instruments. The presence of a current major depressive disorder, according to the Mini International Neuropsychiatric Inventory (MINI) [39] depression module was confirmed by the research assistants. The presence of bipolar depression was ruled out by asking whether patients had ever had an episode of mania or hypomania. Such patients (5 in number) were not included in the final analysis. The research assistants also administered the sociodemographic questionnaire and the AIDS-related stigma scale to all consented patients. The PHQ-9 was administered as part of a validation study, the findings of which will be reported elsewhere. Research assistants abstracted the most recent CD4 count level from patient's charts. All the questionnaires were translated from English into the local language (Luganda), and administered in either language, depending on which of the two was understood by the patient.

## Ethical approval

The study was approved by the Makerere University School of Medicine Ethics committee and the University of Cape Town Health Sciences Human Research Ethics Committees. Study participants received a transport refund of 10,000 Ugandan shillings (approximately 4\$).

## Study instruments

The MINI was designed as a brief structured interview for diagnosing the major Axis I psychiatric disorders in DSM-IV and can be administered in  $18.7 \pm 11.6$  minutes (median 15 minutes). The MINI has been used in a number of studies as a diagnostic instrument among PLWHA in Uganda [7,35,36,40].

AIDS related stigma scale [41] is a 9 item that developed for use in sub-Saharan Africa. It was validated among 2300 patients, and showed good psychometric properties. The internal consistency of the scale was 0.75, and was time stable over three months  $r = 0.67$ . The 9- item AIDS related stigma scale taps into a broad range of stigmatizing beliefs including negative beliefs towards self and others (internalized and enacted variables of stigma) [41].

Sociodemographic information, presence of opportunistic infections and CD4 counts was collected from all participants using a standardized questionnaire.

The PHQ-9 was adapted from the primary care evaluation of mental disorders (PRIME MD) screening questionnaire for depressive symptoms, and has 9 questions with a score ranging from 0 to 3 for each question (maximum score of 27). A threshold score of 10 or higher is considered to indicate mild major depressive disorder, 15 or higher indicates moderate major depressive disorder, and 20 or higher severe major depressive disorder. The internal consistency of the PHQ-9 was 0.65 [42]. The PHQ-9 has not been validated in Uganda; however, it was validated among PLWHA in Kenya providing good psychometric properties with a coefficient alpha of 0.78. [43].

## Study measures

A diagnosis of a major depressive disorder was arrived at if participants had at least 5 of the 9 DSM-IV-TR symptoms for major depression, and were judged to have social and occupational impairments as a result of the symptoms. Persons diagnosed as depressed were referred to the attending clinic medical officer for treatment. AIDS related stigma was diagnosed if patients positively endorsed at least 5 out of the nine questions. Persons diagnosed with AIDS-related stigma were referred to the hospital counsellor.

## Data Analysis

Data was analysed using STATA 11.2 [44]. We initially compared individuals with and without major depressive disorder using bivariate analysis; variables that were statistically significant at bivariate analysis were then entered into a multivariable model following a stepwise hierarchical format. Logistic regression was used to test for significant associations, controlling for age and gender. Major depressive disorder was the dependent variable, with AIDS related stigma, immune status and sociodemographic variables as independent variables. We also assessed whether the sociodemographic and clinical variables were confounding the association between AIDS related stigma and Major depression.

## Results

The mean age of the respondents was 38.8 years (SD 9.81; range 18–71). Of the 368 participants, 72% were female. About two thirds (65.5%) had some form of employment, and only 196

**Table 1.** Sociodemographic and clinical characteristics of the respondents.

| Variable                       | Frequency(%)            |
|--------------------------------|-------------------------|
| <b>Major depression</b>        |                         |
| Yes                            | 64(17.39%)              |
| No                             | 304(82.61%)             |
| <b>Gender</b>                  |                         |
| Male                           | 107(29%)                |
| Female                         | 261(71%)                |
| <b>Age</b>                     |                         |
| 18–29                          | 65(17.7%)               |
| 30–39                          | 144(39.1%)              |
| 40–49                          | 108(29.3%)              |
| 50+                            | 51(13.8%)               |
| Age(Mean(sd))                  | 38.84(10.08)            |
| <b>AIDS stigma</b>             |                         |
| Yes                            | 29(7.88%)               |
| No                             | 339(92.1%)              |
| <b>Marital status</b>          |                         |
| Not married                    | 229(62.2%)              |
| Married                        | 139(37.8%)              |
| <b>Employment</b>              |                         |
| Employed                       | 241(65.5%)              |
| Not employed                   | 127(34.5%)              |
| <b>Education status</b>        |                         |
| Primary education              | 170(46.2%)              |
| Secondary Education            | 198(53.8%)              |
| <b>CD4 counts</b>              |                         |
| <200                           | 61(16.6%)               |
| >201                           | 307(83.4%)              |
| CD4(Mean(sd))                  | 328.22(182.36)          |
| Median                         | 336 IQR 25–75%(250–356) |
| <b>Opportunistic Infection</b> |                         |
| Yes                            | 154(41.8%)              |
| No                             | 214(58.2%)              |
| <b>WHO stage</b>               |                         |
| I                              | 92(25%)                 |
| II                             | 135(36.7%)              |
| III                            | 95(25.8%)               |
| IV                             | 41(11.1%)               |

doi:10.1371/journal.pone.0048671.t001

(53.8%) had attained at least secondary education. Mean CD4+ was 329.70, (SD 183.95; range 1–999). Median CD4+ was 336, inter-quartile range 25–75% (250–356). The prevalence of major depressive disorder was 17.4%. Twenty nine out of the 368 participants (7.9%) had AIDS related stigma. (See table 1).

At bivariate analysis, participants with major depressive disorder were more likely to have AIDS-related stigma [OR 1.61, CI (1.19–2.17)], an opportunistic infection [OR 1.89, CI (1.05–3.38)], and a lower CD4  $\geq$ 200 [OR 0.52 CI (0.27–0.99)]. Being of younger age [OR 0.42 CI (0.19–0.92)], lacking employment [OR 0.53, CI (0.30–0.91)] and having a lower

**Table 2.** Bivariate analysis of the sociodemographic and clinical characteristics of the respondents.

| Variable                       | Depressed<br>(frequency, %) | Not depressed<br>(frequency, %) | P-value       |
|--------------------------------|-----------------------------|---------------------------------|---------------|
| <b>Gender</b>                  |                             |                                 |               |
| Male                           | 18 (16.82)                  | 89(83.18)                       |               |
| Female                         | 46(17.62)                   | 215(82.38)                      | 0.854         |
| <b>Age</b>                     |                             |                                 |               |
| 18–29                          | 17(26.15)                   | 48 (73.85)                      |               |
| 30–39                          | 27(18.75)                   | 117(81.25)                      | 0.068         |
| 40–49                          | 14(12.96)                   | 94(87.04)                       | <b>0.014*</b> |
| 50+                            | 6(11.76)                    | 45(88.24)                       | <b>0.034*</b> |
| <b>AIDS stigma</b>             |                             |                                 |               |
| Yes                            | 10 (34.48)                  | 19(65.52)                       | <b>0.002*</b> |
| No                             | 54(15.93)                   | 285(84.07)                      |               |
| <b>Marital status</b>          |                             |                                 |               |
| Not married                    | 37 (16.16)                  | 192(83.84)                      |               |
| Married                        | 27(19.42)                   | 112(80.58)                      | 0.423         |
| <b>Employment</b>              |                             |                                 |               |
| Employed                       | 34(14.11)                   | 207(85.89)                      |               |
| Not employed                   | 30(23.62)                   | 97(76.38)                       | <b>0.023*</b> |
| <b>Education level</b>         |                             |                                 |               |
| Primary                        | 39(22.94)                   | 131(77.06)                      |               |
| Secondary                      | 25(12.63)                   | 173(87.37)                      | <b>0.010*</b> |
| <b>CD4 counts</b>              |                             |                                 |               |
| $\leq$ 200                     | 16 (26.23)                  | 45(73.77)                       |               |
| $\geq$ 201                     | 48(15.64)                   | 259(84.36)                      | <b>0.049*</b> |
| <b>Opportunistic Infection</b> |                             |                                 |               |
| <b>Infection</b>               |                             |                                 |               |
| Yes                            | 19(12.34)                   | 135(87.66)                      | <b>0.032*</b> |
| No                             | 45(21.03)                   | 169(78.97)                      |               |
| <b>WHO stage</b>               |                             |                                 |               |
| I                              | 13(14.13)                   | 79 (85.87)                      |               |
| II                             | 26(19.26)                   | 109(80.74)                      | 0.316         |
| III                            | 15(15.79)                   | 80(84.21)                       | 0.751         |
| IV                             | 10(24.39)                   | 31(75.61)                       | 0.153         |

\*denotes p value <0.05 and statistical significance.  
doi:10.1371/journal.pone.0048671.t002

education [OR 0.48, CI (0.27–0.84)] were also associated with depression at bivariate analysis. (See table 2).

We included all statistically significant variables in the logistic regression model, and used a stepwise hierarchical model analysis method. In the final model, major depressive disorder was associated with AIDS-related stigma [(OR = 1.65, CI 1.20–2.26)], CD4+ counts of  $\geq$ 200 [OR 0.43, (CI 0.20–0.91)] and a younger age [OR 0.95, CI 0.92–0.98]. (See table 3).

## Discussion

Major depressive disorder was prevalent in our study population, occurring in 17.4% of the participants. Previous studies conducted among PLWHA in Uganda have reported higher depression prevalence [9,45]; findings which could be explained by the fact that in those studies, the diagnosis of depression was

**Table 3.** Multivariable analysis showing associations between major depression, AIDS related stigma and CD4 counts.

| Variable           | Depressed<br>(frequency, %) | Unadjusted<br>OR | 95% CI           | Adjusted<br>OR | 95% CI           |
|--------------------|-----------------------------|------------------|------------------|----------------|------------------|
| <b>Age</b>         |                             |                  |                  |                |                  |
| 18–29              | 17(26.15)                   |                  |                  |                |                  |
| 30–39              | 27(18.75)                   | 0.65             | 0.32–1.30        |                |                  |
| 40–49              | 14(12.96)                   | <b>0.42*</b>     | <b>0.19–0.92</b> | <b>0.95*</b>   | <b>0.92–0.98</b> |
| 50+                | 6(11.76)                    | 0.37             | 0.13–1.03        |                |                  |
| <b>AIDS stigma</b> |                             |                  |                  |                |                  |
| Yes                | 10 (34.48)                  | <b>1.61*</b>     | <b>1.19–2.17</b> | <b>1.65*</b>   | <b>1.20–2.26</b> |
| No                 | 54(15.93)                   |                  |                  |                |                  |
| <b>CD4 counts</b>  |                             |                  |                  |                |                  |
| ≤200               | 16 (26.23)                  |                  |                  |                |                  |
| ≥201               | 48(15.64)                   | <b>0.52*</b>     | <b>0.27–0.99</b> | <b>0.43*</b>   | <b>0.20–0.91</b> |

\*denotes p value <0.05 and statistical significance. Odds ratios adjusted for sex and age.  
doi:10.1371/journal.pone.0048671.t003

made using a screening instrument, rather than a diagnostic one. Our population comprised of medically stable participants who were generally healthier, and this could explain the lower prevalence compared to the other Ugandan studies..

AIDS-related stigma, a condition that has been associated with adverse health outcomes in PLWHA was equally prevalent in the study population. Our finding about AIDS related stigma is also in keeping with previous studies that have reported a high burden of stigma in PLWHA [46–48].

We found an association between major depressive disorder and AIDS related stigma, meaning that both conditions may be present in the same HIV-positive individual attending PHC. Our findings are in keeping with a previous study that documented an association between depression and stigma in PLWHA [17]. Poor psychosocial functioning, the presence of opportunistic infections, poor immune status and the fear of dying from a chronic illness could explain the existence of either of these conditions, as well as their association with each other. Previous studies have reported that stigma among PLWHA is associated with poor psychosocial functioning [21,49]. It's possible that people with poor psychological functioning may develop depression.

Similarly, the presence of opportunistic infections and poor immune status has been associated with depression in PLWHA [17,19,45]. It can also be argued that depressed PLWHA who have opportunistic infections and low CD4+ counts could develop stigma as a result of their condition. The fear of dying from a chronic illness may also explain the presence of both conditions. However, the cross-sectional nature of our study makes it difficult to establish causality, and the direction of the development of each condition.

Our findings regarding the association between major depressive disorder and low CD4 counts are in keeping with previous studies [17,45,50]. These findings could be explained by the fact that late stage disease (manifested by low CD4 counts) may have an aetiological role in the development of depression among PLWHA. The presence of depression in PLWHA could also lead to a decline in CD4 levels; such an association has been previously documented [17,50]. It's also possible that the sicker PLWHA become, the more likely they are to report symptoms of major depressive disorder. More work is needed to examine such hypotheses.

The association between major depressive disorder and younger age contradicts previous studies where major depressive disorder was particularly common in older people attending PHC services [35,36,51]. Perhaps the different contexts in which HIV/AIDS manifests could explain such differences. Specific neurobiological factors may play a role in contributing to major depressive disorder in older subjects; further work is needed to explore this hypothesis.

A number of limitations in this study deserve emphasis. We utilised a cross-sectional design, so that causality cannot be fully addressed. A longitudinal follow-up study could provide better insight into the precise nature of the relationship between depression, and the studied factors. That said, PLWHA should be assessed for both major depressive disorder and AIDS related stigma since both conditions may present concurrently in the same individual.

Secondly, the study was conducted in a single PHC site, and may not be representative of the burden of major depressive disorder in PLWHA in Uganda.

Thirdly, we didn't abstract information regarding patients being on ART, despite the fact that a number of PLWHA at the study site were accessing ART. This information could have given us better insight into its relationship with depression and stigma.

Fourth, the instruments we used including the MINI, AIDS stigma scale, and the PHQ-9 haven't been validated in Uganda. This could have led to some inaccuracies in our findings. However, a number of studies have been conducted in Uganda using the MINI, and have reported similar prevalence findings to our study [5,9,52,53]

Despite these limitations, this study reports on the association between major depression, AIDS stigma and a number of variables among PLWHA in sub-Saharan Africa. Clinicians working in HIV settings should regularly assess for both depression and stigma among clinic attendees, since these conditions may be present concurrently in PLWHA.

In conclusion, due to the high burden of major depressive disorder, and its association with AIDS related stigma among PLWHA, routine screening of PLWHA for both conditions is recommended. However, further work may be required to understand the complex relationships between AIDS stigma and major depressive disorder. Further work to disentangle the

relationships between major depressive disorder and low CD4 counts is equally needed.

## Acknowledgments

Dr Akena was supported by the University of Cape Town (UCT) International Student's Scholarship and the African Doctoral Dissertation Fellowship.

## References

- World Health Organization (2005) WHO (2005), World Health Organization Publications, World Health Organization Publications Geneva.
- Ministry of Health of Uganda (2012) HIV/AIDS Sero-Behavioural Survey (UHSBS).
- Ministry of Health of Uganda (2005) Preliminary Results of the Uganda HIV/AIDS Sero-Behavioural Survey (UHSBS). Ministry of Health Kampala, Uganda.
- Bunmi OO, Matthew JM, O'Clearigh C, Steven AS (2006) Review of Treatment Studies of Depression in HIV. International AIDS Society–USA Topics in HIV Medicine, Review – Depression and HIV Volume 14 Issue 3 August/September 2006.
- Nakimuli-Mpungu E, Mutamba B, Nshemerirwe S, Kiwuwa MS, Musisi S, et al. (2011) Depression, alcohol abuse, and disclosure of HIV serostatus among rural HIV-positive individuals in western Uganda. *Neurobehavioral HIV Medicine* 3: 19–25.
- Mogga S, Prince M, Alem A, Kebede D, Stewart R, et al. (2006) Outcome of major depression in Ethiopia: Population-based study. *The British Journal of Psychiatry* 2006 189: 241–246.
- Margaret M (1992) Nature of psychiatric disorders in HIV-1 patients in Butabika Hospital. Kampala: Makerere University.
- Maling S, Todd J, Van der Paal L, Grosskurth H, Kinyanda E (2011) HIV-1 seroprevalence and risk factors for HIV infection among first-time psychiatric admissions in Uganda. *AIDS Care* Vol 23, No 2, February 2011, 171–178.
- Nakasujja N, Skolasky R.L, Musisi S, Allebeck P, Robertson K, et al. (2010) Depression symptoms and cognitive function among individuals with advanced HIV infection initiating HAART in Uganda. *BMC Psychiatry* 10: 44.
- Nakimuli-Mpungu E, Bass JK, Pierre Alexandre P, Mills EJ, Musisi S, et al. (2011) Depression, Alcohol Use and Adherence to Antiretroviral Therapy in Sub-Saharan Africa: A Systematic Review. *AIDS Behav* 15: 376–388.
- Horberg MA, Silverberg MJ, Hurley LB, Towner WJ, Klein DB, et al. (2008) Effects of Depression and Selective Serotonin Reuptake Inhibitor Use on Adherence to Highly Active Antiretroviral Therapy and on Clinical Outcomes in HIV-Infected Patients. *J Acquir Immune Defic Syndr* 2008;47:384–390.
- Ammassari A, Antinori A, Aloisi MS, Trotta MP, Murri R, et al. (2004) Depressive Symptoms, Neurocognitive Impairment, and Adherence to Highly Active Antiretroviral Therapy Among HIV-Infected Persons. *Psychosomatics* 2004; 45:394–402.
- Treisman G, Angelino A (2007) Interrelation between Psychiatric Disorders and the Prevention and Treatment of HIV Infection. *Clinical Infectious Diseases* 2007; 45:S313–7.
- Bouhnik AD, Préau M, Vincent E, Carrieri MP, Gallais H, et al. (2005) Depression and clinical progression in HIV-infected drug users treated with highly active antiretroviral therapy. *Antiviral Therapy* 10:53–61.
- Cruess DG, Douglas SD, Petitto JM, Have TT, Gettes D, et al. (2005) Association of Resolution of Major Depression With Increased Natural Killer Cell Activity Among HIV-Seropositive Women. *Am J Psychiatry* 2005; 162:2125–2130.
- Leserman J, Petitto JM, Golden RN, Gaynes BN, Gu H, et al. (2000) Impact of Stressful Life Events, Depression, Social Support, Coping, and Cortisol on Progression to AIDS. *Am J Psychiatry* 2000; 157:1221–1228.
- Burack JH, Barrett DC, Stall RD, Chesney MA, Ekstrand ML, et al. (1993) Depressive Symptoms and CD4 Lymphocyte Decline Among HIV-Infected Men. *JAMA* 270: 2568–2573.
- Sherbourne CD, Hays RD, Fleishman JA, Vitello B, Magruder KM, et al. (2000) Impact of Psychiatric Conditions on Health-Related Quality of Life in Persons With HIV Infection. *Am J Psychiatry* 2000; 157:248–254.
- Evans DL, Ten Have TR, Douglas SD, Gettes DR, Morrison M, et al. (2002) Association of Depression With Viral Load, CD8 T Lymphocytes, and Natural Killer Cells in Women With HIV Infection. *Am J Psychiatry* 2002; 159:1752–1759.
- Simbayi LC, Kalichman S, Strebel A, Cloete A, Henda N, et al. (2007) Internalized stigma, discrimination, and depression among men and women living with HIV/AIDS in Cape Town, South Africa. *Social Science & Medicine* 64: 1823–1831.
- Lia L, Leea S-J, Thammawijay P, Jiraphongs C, Rotheram-Borusa MJ (2009) Stigma, social support, and depression among people living with HIV in Thailand. *AIDS Care* 21: 1007–1013.
- Olley BO, Seedat S, Nel DG, Stein DJ (2004) Predictors of Major Depression in Recently Diagnosed Patients with HIV/AIDS in South Africa. *AIDS PATIENT CARE and STDs* 18: 481–487.
- Cook JA, Grey D, Burke J, Cohen M.H, Gurtman AC, et al. (2004) Depressive Symptoms and AIDS-Related Mortality Among a Multisite Cohort of HIV-Positive Women. *American Journal of Public Health* 94.
- Ickovics JR, Hamburger ME, Vlahov D (2001) mortality, CD4 cell count decline, and depressive symptoms among HIV-seropositive women: longitudinal analysis from the HIV Epidemiology Research Study. *JAMA* 2001;285:1466–74.
- Bjelland I, Krokstad S, Mykletun A, Dahl AA, Tell GS, et al. (2008) Does a higher educational level protect against anxiety and depression? The HUNT study. *Social Science & Medicine* 66 1334–1345.
- Dewa CS, Thompson AH, Jacobs P (2011) The association of treatment of depressive episodes and work productivity. *Can J Psychiatry* 56: 743–750.
- Mahajan AP, Sayles JN, Patel VA, Remien RH, Ortiz D, et al. (2008) Stigma in the HIV/AIDS epidemic: A review of the literature and recommendations for the way forward. *AIDS* 22: S67–S79.
- MacQuarrie K, Eckhaus T, Nyblade L (2009) HIV-related Stigma and Discrimination: A Summary of Recent Literature UNAIDS.
- Chesney MA, Smith AW (1999) Critical Delays in HIV Testing and Care The Potential Role of Stigma. *American Behavioral Scientist*, 42: 1162–1174.
- Bond V, Chase E, Aggleton P (2002) Stigma, HIV/AIDS and prevention of mother-to-child transmission in Zambia. *Evaluation and Program Planning* 25: 347–356.
- Lichtenstein B, Laska MK, Clair JM (2002) Chronic Sorrow in the HIV-Positive Patient: Issues of Race, Gender, and Social Support. *AIDS Patient Care and STDs* 16: 27–38. doi:10.1089/108729102753429370.
- Sorsdahl KR, Kakuma R, Wilson Z, Stein DJ (2011) The internalized stigma experienced by members of a mental health advocacy group in South Africa. *International Journal of Social Psychiatry* XX(X) 1–7.
- Kalichman S, Simbayi LC (2003) HIV testing attitudes, AIDS stigma, and voluntary HIV counselling and testing in a black township in Cape Town, South Africa. *Sex Transm Infect* 2003;79:442–447.
- Rabkin JG, Williams JB, Remien RH, Goetz R, Kertzner R, et al. (1991) Depression, distress, lymphocyte subsets, and human immunodeficiency virus symptoms on two occasions in HIV-positive homosexual men. *Archives of General Psychiatry* 48: 111–119.
- Akena D, Musisi S, Kinyanda E (2010) A comparison of the clinical features of depression in hiv-positive and hiv-negative patients in Uganda. *African Journal of Psychiatry* 13: 43–51.
- Nakimuli-Mpungu E, Musisi S, Mpungu S.K, Katabira E (2006) Primary Mania Versus HIV-Related Secondary Mania in Uganda. *Am J Psychiatry* 2006; 163:1349–1354.
- Akhtar-Danesh N, Landeen J (2007) Relation between depression and socio-demographic factors. *International Journal of Mental Health Systems*: 1:4 doi:10.1186/1752-4458-1181-1184.
- Spitzer R, Kroenke K, Williams J (1999) Validation and utility of a self-report version of PRIME-MD: the PHQ Primary Care Study. *Journal of the American Medical Association* 282: 1737–1744.
- Sheehan DV, Lecrubier Y, Harnett-Sheehan K (1998) The Mini International Neuropsychiatric Interview (M.I.N.I.): The Development and Validation of a Structured Diagnostic Psychiatric Interview. *J Clin Psychiatry*, 1998;59(suppl 20):22–33.
- Kinyanda E, Musisi S (1998) Frequency with which psychiatric disorder is associated with positive HIV-1 serostatus as seen in persons attending a TASO clinic in Mulago Hospital, Kampala, Uganda. *South Africa Medical Journal* 1998; 88:1178.
- Kalichman SC, Simbayi LC, Jooste S, Toefy Y, Cain D, et al. (2005) Development of a Brief Scale to Measure AIDS-Related Stigma in South Africa. *AIDS and Behavior*, Vol 9, No 2, June 2005 (C 2005).
- Spitzer R, Kroenke K, Williams J (1999) Validation and utility of a self-report version of PRIME-MD: the PHQ Primary Care Study. *Journal of the American Medical Association* 1999; 282: 1737–1744.
- Monahan PO, Shacham E, Reece M, Kroenke K, Ong'or WO, et al. (2008) Validity/Reliability of PHQ-9 and PHQ-2 Depression Scales Among Adults Living with HIV/AIDS in Western Kenya. *Journal of General Internal Medicine* 24: 189–197.
- STATA (2011) STATA, Statistics/Data Analysis. In: LP . S, editor. <http://www.statacom.USA:4905LakewayDriveCollegeStation.Texas77845USA800-STATA-PC>.
- Kaharuza FM, Bunnell R, Moss S, Purcell DW, Bikaako-Kajura W, et al. (2006) Depression and CD4 Cell Count Among Persons with HIV Infection in Uganda. *AIDS Behav* (2006) 10:S105–S111.

## Author Contributions

Conceived and designed the experiments: DA JAJ DJS. Performed the experiments: DA. Analyzed the data: DA. Wrote the paper: DA JAJ DJS. Conceptualization and editing the manuscript: SM.

46. Mahajan AP, JN, Patel VA, Remien RH, Ortiz D, et al. (2008) Stigma in the HIV/AIDS epidemic: A review of the literature and recommendations for the way forward. *AIDS* 22: S67–S79.
47. Genberg BL, Kawichai S, Chingono A, Sendah M, Chariyalertsak S, et al. (2008) Assessing HIV/AIDS Stigma and Discrimination in Developing Countries. *AIDS Behav* 12: 772–780.
48. Murphy DA, Austin EL, Greenwell L (2006) Correlates of HIV-Related Stigma Among HIV-Positive Mothers and Their Uninfected Adolescent Children. *Women & Health*, Vol 44(3) 2006 Available online at <http://whhaworthpress.com>.
49. Lichenstein B, Laska MK, Clair JM (2002) Chronic Sorrow in the HIV-Positive Patient: Issues of Race, Gender, and Social Support. *AIDS PATIENT CARE and STDs*
50. Ickovics JR, Hamburger ME, Vlahov D (2001) Mortality, CD4 cell count decline, and depressive symptoms among HIV-seropositive women: longitudinal analysis from the HIV Epidemiology Research Study. *JAMA* 285: 146–174.
51. Kinyanda E, Woodburn P, Tugumisirize J, Kagugube J, Ndyabangi S, et al. (2011) Poverty, life events and the risk for depression in Uganda. *Soc Psychiat Epidemiol* 46: 35–44.
52. Akena DH, Musisi S, Kinyanda E (2010) A comparison of the clinical features of depression in hiv-positive and hiv-negative patients in Uganda. *African Journal of Psychiatry* 13: 43–51.
53. Akena D, Joska J, Musisi S, Stein DJ (2012) Sensitivity and specificity of a visual depression screening instrument among hiv-positive individuals in Uganda, an area with low literacy. *Aids and Behaviour*: DOI 10.1007/s10461-10012-10267-10461.
